# Supplementary material for: Towards enhanced optical sensor performance: SEIRA and SERS with plasmonic nanostars
Source: Royal Society of Chemistry journal article supplement (doi:10.1039/c6an02596j), 2017-01-01
Supplement: c6an02596j1.pdf [file c6an02596j1.pdf]

## Towards enhanced optical sensor performance: SEIRA and SERS with plasmonic nanostars

O. Bibikova,<sup>a,b,c,d</sup> J. Haas,<sup>b</sup> A.I. López-Lorente,<sup>b</sup> A. Popov<sup>a,e,f</sup>, M. Kinnunen,<sup>a</sup> I. Meglinski<sup>a,e,f</sup> and B. Mizaikoff<sup>b,\*</sup>

### Supporting Information

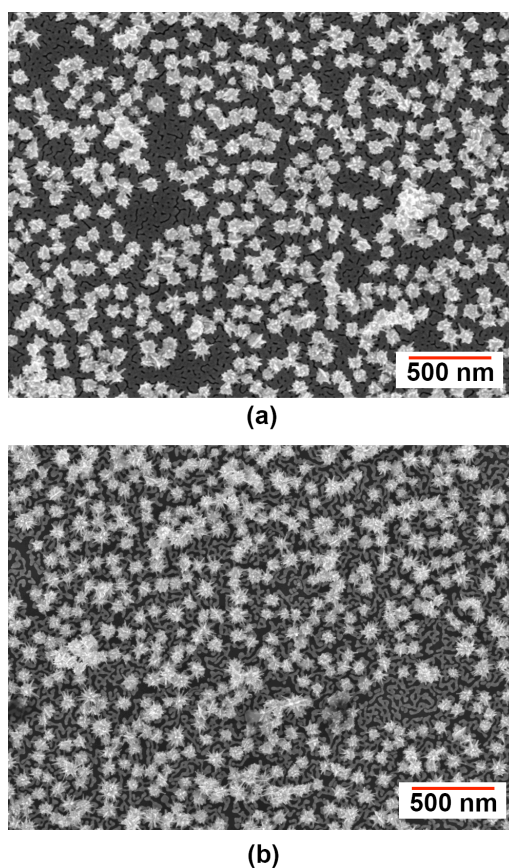

Figure S1. SEM images of a Si chip with a 5 nm Au layer, the SH-PEG-SH polymer attached on top, and immobilized AuNSTs before (a) and after (b) cleaning procedures including washing with acetone, isopropanol, ethanol, and sonication.
